# Supplementary material for: Distribution update, male genitalia, natural history, and conservation of the stump-tailed porcupine Coendou rufescens in South America
Source: publisher site journal article supplement (doi:10.1515/mammalia-2021-0025), 2021-11-19
Supplement: Supplementary file 1 [file j_mammalia-2021-0025_suppl.docx]

**Supplementary material**

**Distribution update, male genitalia, natural history, and conservation of the stump-tailed porcupine *Coendou rufescens* (Gray, 1865) in South America**

Héctor E. Ramírez-Chaves et al.

DOI 10.1515/mammalia-2021-0025

**Supplementary Table S1:** Sources of information of *Coendou rufescens* used in this study. Updatedlocality records for *Coendou rufescens* in Bolivia, Colombia, Ecuador, and Peru. Abbreviatures not explained in the text are: American Museum of Natural History (AMNH), New York, USA; Carnegie Museum (CM), Pittsburgh, USA; Centro de Ornitología y Biodiversidad (CORBIDI), Lima, Peru; Instituto de Ciencias Naturales, Universidad Nacional de Colombia (ICN), Bogotá, Colombia; Museo de Historia Natural Gustavo Orcés, Escuela Politécnica Nacional (MEPN), Quito, Ecuador; Museo de Historia Natural Noel Kempff Mercado (MNKM), Santa Cruz, Bolivia; National Museum of Natural History (USNM), Washington, USA; Museo de Zoología, Pontificia Universidad Católica del Ecuador (QCAZ), Quito, Ecuador; Reserva Natural Hato Viejo (RNHV), Valle del Cauca, Colombia; The Museum of Comparative Zoology at Harvard University (MCZ), Cambridge, England; The Museum National d’Histoire Naturelle (MNHN), Paris, France; The Natural History Museum (BMNH), London, England; The Royal Ontario Museum (ROM), Toronto, Canada; The Museum of Vertebrate Zoology at the University of California (MVZ), Berkeley, USA; Universidad del Valle (UV), Cali, Colombia.

| **Country** | **Locality** | **Lat/Long** | **Elevation (m)** | **Voucher** | **Reference** | **Remarks** |
| --- | --- | --- | --- | --- | --- | --- |
| Bolivia | Cochabamba, Incachaca | -17.2293 / -66.4826 | 3504 | CM 5255 | Voss (2011, 2015) |  |
| Bolivia | Cochabamba, Pojo | -17.7576 / -64.8555 | 2080 |  | Acosta et al. (2018) | Photograph |
| Bolivia | Cochabamba, Carrasco, El Sunchal | -17.784 / -64.796 | 2637 | MNKM-5562 | Acosta et al. (2018) |  |
| Bolivia | Santa Cruz, Manuel María Caballero, Torrecillas en la región de La Siberia | -17.867 / -64.612 | 2589 | MNKM-5563 | Acosta et al. (2018) |  |
| Bolivia | Santa Cruz, La Siberia, Copajira | -17.8333 / -64.6666 | 2500 |  | Acosta et al. (2018) | Observation |
| Bolivia | Santa Cruz, La Siberia, La Jara | -17.8333 / -64.6666 | 2500 |  | Acosta et al. (2018) | Observation |
| Colombia | Antioquia, Concordia | 6.0455 / -75.9075 | 2000 | BMNH 73.6.12.11 | Alberico et al. (1999), Voss (2015), Ramírez-Chaves et al. (2016), Narváez-Romero et al. (2018) |  |
| Colombia | Antioquia, Retiro, Reserva Ecológica San Sebastián de La Castellana | 6.1076 / -75.5488 | 2899 |  | Delgado-V (2009), Voss (2015) | Literature |
| Colombia | Antioquia, Río Porce | 6.8379 / -75.1269 | 1918 | MLS 189 | MLS 189 |  |
| Colombia | Antioquia, El Porvenir, Guarne | 5.8815 / -75.1939 | 1836 |  | This work | Photograph, individual feeding, December 2019 |
| Colombia | Antioquia, Medellín, Las Palmas | 6.1487 / -75.5293 | 2468 | MHN-UCa:1865 | This work |  |
| Colombia | Antioquia, Cañasgordas | 6.7425 / -76.0188 | 1394 |  | iNaturalist | Photograph, individual roadkilled |
| Colombia | Antioquia, La Ceja | 6.0299 / -75.4306 | 2141 |  | iNaturalist | Photograph |
| Colombia | Antioquia, La Estrella, Reserva El Romeral de San Antonio de Prado | 6.1102 / -75.6472 | 2180 |  | iNaturalist | Photograph |
| Colombia | Antioquia, Rionegro | 6.1667 / -75.4376 | 2152 |  | iNaturalist | Photograph |
| Colombia | Boyacá, Macanal, La Mesa | 5.0082 / -73.3119 | 2280 |  | Peñuela-Diaz et al. (2016) | Literature |
| Colombia | Boyacá, Campohermoso, Cuenca Quebrada Blanca | 5.05 / -73.15 | 2013 |  | Restrepo-Cardona et al. (2019) | Literature |
| Colombia | Boyacá, Campohermoso, DMRI Cuchillas Negra y Guanaque | 5.0311 / -73.1033 | 1115 |  | Peñuela-Diaz et al. (2016) | Literature |
| Colombia | Caldas, Manizales, Reserva Rio Blanco | 5.0851 / -75.4657 | 2380 |  | Sánchez et al. (2004), Voss (2015) | Literature |
| Colombia | Caldas, Manizales, Manizales | 5.0661 / -75.4847 | 2200 | ICN 16148 | Ramírez-Chaves et al. (2016) |  |
| Colombia | Caldas, Manizales, Manizales, Parque Olalla | 5.0467 / -75.4944 | 2150 | MHN-UCa:414 | This work |  |
| Colombia | Caldas, Manizales, Corregimiento El Manantial, vereda Pueblo Hondo | 5.1347 / -75.4809 | 1950 | MHN-UCa:1042 | This work |  |
| Colombia | Caldas, Manizales, Vereda La Esperanza, Puente río Verdum | 5.0287 / -75.3876 | 2787 | MHN-UCa:2759 | This work |  |
| Colombia | Caldas, Manizales, Vereda La Enea Parte | 5.0274 / -75.3894 | 2762 | MHN-UCa:2760 | This work |  |
| Colombia | Caldas, Villamaría, Vereda Gallinazo, Bosques de la CHEC | 5.0239 / -75.3997 | 2593 | MHN-UCa:2761 | This work |  |
| Colombia | Caldas, Manizales, Vereda La Esperanza, Finca El Bosque | 5.0253 / -75.3686 | 3156 | MHN-UCa:2936 | This work |  |
| Colombia | Caldas, Manizales, Sector Torre 4 | 5.0257 / -75.3935 | 2705 | MHN-UCa:2939 | This work | Human observation, individual feeding, on 30 June 2016 |
| Colombia | Caldas, Manizales, Hacienda El Bosque, km 18 vía a Letras | 5.0265 / -75.3691 | 3029 | MHN-UCa: 3145 | This work |  |
| Colombia | Caldas, Manizales, Hacienda El Bosque, km 18 vía a Letras | 5.0265 / -75.3691 | 3029 | MHN-UCa: 3177 | This work | Male |
| Colombia | Caldas, Manizales, Reserva Natural Río Blanco, Finca Vivero | 5.0833 / -75.4654 | 2600 | MHN-UCa:1398 | This work |  |
| Colombia | Caldas, Anserma, en la vía a Anserma desde Manizales | 5.2381 / -75.7842 | 1790 | MHN-UCa:1586 | This work | Adult female roadkill, July 2017 |
| Colombia | Caldas, Villamaría, PNN Los Nevados | 4.9415 / -75.3678 | 3728 | MHN-UCa:1609 | This work |  |
| Colombia | Caldas, Villamaría, Bosques de la CHEC | 4.875 / -75.4 | 2650 | MHN-UCa:1746 | This work | Human observation, individual perching, 30 June 2016 |
| Colombia | Caldas, Villamaría, Gallinazo, Reserva forestal protectora "Bosques de la CHEC" - Sendero "Minas de Frailes" | 5.0222 / -75.4275 | 1775 | MHN-UCa:1933 | This work |  |
| Colombia | Cauca, Totoró, Quintana | 2.5103 / -76.4019 | 2750 | AMNH 181483/181484 | Voss (2011) |  |
| Colombia | Cauca, Sotará, Paispamba | 2.2531 / -76.6144 | 2531 | ROM 57254 | Voss (2015) |  |
| Colombia | Cauca, La Vega, | 2.0009 / -76.7777 | 2000 | FMNH 86765/88528 | Voss (2011), Ramírez-Chaves et al. (2016) |  |
| Colombia | Cauca, Cerro Altamira, Charguayaco, Sabanetas | 2.4514 / -76.8108 | 2000 | FMNH 88525/89262; ICN 10041/10042/10043; MHNUC uncatalogued | Voss (2011), Ramírez-Chaves et al. (2016) |  |
| Colombia | Cauca, Popayán, Quintana | 2.4503 / -76.4458 | 2412 | FMNH 88526, 88527, 89263 | Voss (2011), Ramírez-Chaves et al. (2016) |  |
| Colombia | Cauca, El Tambo, Sabanetas | 2.5373 / -73.8964 | 1900 | FMNH 89266; MHNUC 204 | Alberico et al. (1999), Voss (2011), Ramírez-Chaves et al. (2016) |  |
| Colombia | Cauca, El Tambo, Munchique | 2.7497 / -76.7821 | 1222 | FMNH 23106/ 23286/88524/89261/ 89264/ 89265; MHNUC 4045-4048/4050-4052 | Alberico et al. (1999), Voss (2011), Ramírez-Chaves et al. (2016) |  |
| Colombia | Cauca, Silvia | 2.6108 / -76.3788 | 2040 | MHNUC 106E/109E | Ramírez-Chaves et al. (2016) |  |
| Colombia | Cauca, Sotará, road to Sotará | 2.2531 / -76.6144 | 2726 | MHNUC uncatalogued/Collector number PRP 1205 | Ramírez-Chaves et al. (2016) |  |
| Colombia | Cauca, El Tambo, Vereda Palacé | 2.5523 / -76.6908 | 1564 |  | This wotk |  |
| Colombia | Cauca, El Tambo, Cerro Altamira | 2.4514 / -76.8108 | 1750 | ICN 10040 | Alberico et al. (1999), Ramírez-Chaves et al. (2016) |  |
| Colombia | Cauca, El Tambo, Inspección de Policía Uribe | 2.4347 / -76.8108 | 1750 | ICN 10030/31/32/33/34/35/36/37/38/39; MHNUC 4046, 4047, 4049, 4053-4056 | Alberico et al. (1999), Ramírez-Chaves et al. (2016) |  |
| Colombia | Cauca, Popayán, Rio Blanco, Las Guacas | 2.5059 / -76.5522 | 1824 | MHNUC uncatalogued | Ramírez-Chaves et al. (2016) |  |
| Colombia | Cauca, Inzá, km 46 road to Inzá | 2.5006 / -76.5294 | 1654 | UV 4316 | Alberico et al. (1999), Ramírez-Chaves et al. (2016) |  |
| Colombia | Cauca, Vereda Clarete | 2.5166 / -76.5333 | 1826 |  | Alberico et al. (1999) | Literature |
| Colombia | Cauca, Vereda Aguas Claras, Quebrada La Parada, La Tupía | 2.4 / -76.4166 | 2590 |  | Ramírez-Chaves et al. (2008) | Literature |
| Colombia | Cauca, Vereda Santa Teresa | 2.4166 / -76.3833 | 3535 |  | Ramírez-Chaves et al. (2008) | Literature |
| Colombia | Cauca, Vereda Santa Bárbara | 2.3833 / -76.55 | 1900 |  | Ramírez-Chaves et al. (2008) | Literature |
| Colombia | Cauca, Vereda Julumito, Río Sate | 2.45 / -76.65 | 1700 |  | Ramírez-Chaves et al. (2008) | Literature |
| Colombia | Cauca, Vereda Pisojé | 2.4166 / -76.5 | 1800 |  | Ramírez-Chaves et al. (2008) | Literature |
| Colombia | Cauca, Totoró, Río Palacé | 2.4759 / -76.3948 | 2613 |  | Alberico et al. (1999) | Literature |
| Colombia | Cundinamarca, Fómeque, | 4.4847/ -73.8936 | 1895 | AMNH 150028 / USNM 236908 / BMNH 81.1420 | Alberico et al. (1999), Voss (2011, 2015) |  |
| Colombia | Cundinamarca, Fusagasugá, La Aguadita | 4.3884 / -74.32426 | 1884 | AMNH 73678/BMNH 27.5.3.8 | Alberico et al. (1999), Voss (2015) |  |
| Colombia | Cundinamarca, Chingaza | 4.56455 / -73.7508 | 3395 | MNHN1936-1932 | Voss (2011), Ramírez-Chaves et al. (2016), MNHN database |  |
| Colombia | Cundinamarca, Chipaque, Vereda Marilandia | 4.4363 / -74.0945 | 2946 | MUD-M 321 | This work |  |
| Colombia | Cundinamarca, Silvania, Noruega Alta | 4.4264 / -74.3444 | 2035 | MUD-M 577 | This work |  |
| Colombia | Cundinamarca, Fusagasugá, Carretera 4 km to La Aguadita | 4.3884 / -74.3243 | 1884 | ICN 443 | Alberico et al. (1999), Ramírez-Chaves et al. (2016) |  |
| Colombia | Cundinamarca, La Vega | 4.9833 / -74.3333 | 1230 |  | Ramírez-Chaves et al. (2016) | Literature |
| Colombia | Cundinamarca, Choachí | 4.5167 / -73.9167 | 1924 | BMNH 20.11.11.1 | Alberico et al. (1999) |  |
| Colombia | Cundinamarca, Municipality Quetame, Quebrada Susumuco, 13 km WNW Villavicencio | 4.2167 / -73.75 | 1496 |  | Ramírez-Chaves et al. (2016 | Literature |
| Colombia | Cundinamarca, Choachí | 4.5291 / -73.9454 | 2693 |  | iNaturalist | Photograph |
| Colombia | Cundinamarca, La Calera | 4.6781 / -73.9284 | 2848 |  | iNaturalist | Photograph |
| Colombia | Huila, La Plata, Reserva Natural Privada Meremberg | 2.2184 / -76.1169 | 2347 | UV 4317 | Alberico et al. (1999), Voss (2015) |  |
| Colombia | Huila, Tarqui | 2.17007 / -75.94159 | 2119 |  | iNaturalist | Photograph |
| Colombia | Huila, Pitalito | 1.8539 / -76.0514 | 1270 |  | Sanchez and Acosta (2015) | Literature |
| Colombia | Huila, El Agrado, Quebrada Yaguilga | 2.2565 / -75.7698 | 842 |  | CAM 2011 | Literature |
| Colombia | Huila, El Pital, Quebrada Yaguilga | 2.2671 / -75.8042 | 930 |  | CAM 2011 | Literature |
| Colombia | Meta, Puerto López, | 4.1859 / -73.6072 | 418 | ICN 2936 | Ramírez-Chaves et al. (2016) |  |
| Colombia | Nariño, Ricaurte, Reserva Natural La Planada | 1.29185 / -77.99392 | 1840 | PSO-CZ unknown number | Alberico et al. (1999), Voss (2015), Ramírez-Chaves and Noguera-Urbano (2010) |  |
| Colombia | Nariño, Contadero | 0.90895 / -77.54801 | 2590 |  | iNaturalist | Photograph |
| Colombia | Nariño, La Florida, Tambo | 1.40549 / -77.39182 | 2190 |  | iNaturalist | Photograph |
| Colombia | Nariño, Pupiales, Vereda Chires, Mirador páramo de Paja Blanca | 1.016628 / -77.6 | 2800 |  | Ramírez-Chaves and Noguera Urbano (2010) | Literature |
| Colombia | Nariño, Ospina | 1.060432 / -77.55 | 2750 |  | Ramírez-Chaves and Noguera Urbano (2010) | Literature |
| Colombia | Nariño, Sapuyes, El Espino, Volcán Azufral | 1.05 / -77.6833 | 3350 |  | Ramírez-Chaves and Noguera Urbano (2010) | Literature |
| Colombia | Nariño, Túquerres, Reserva Natural volcán Azufral | 1.067303 / -77.5886 | 2900 |  | Ramírez-Chaves and Noguera Urbano (2010) | Literature |
| Colombia | Nariño, Túquerres, Carretera 30 km Tumaco | 1.07115 / -77.7868 | 2894 |  | Ramírez-Chaves and Noguera Urbano (2010) | Literature |
| Colombia | Nariño, Potosí, Puerres, Cerro Negro-San Francisco | 0.81395 / -77.4777 | 3257 |  | Corponariño (2016) | Literature |
| Colombia | Nariño, Puerres, El Verde | 0.8839 / -77.5039 | 2771 |  | Noguera-Urbano et al. (2014) | Literature |
| Colombia | Quindío, Filandia | 4.6858 / -75.6175 | 2007 |  | iNaturalist | Photograph |
| Colombia | Quindío, Salento, Vereda Boquia | 4.6485 / -75.5824 | 1860 |  | This work | Photograph, individual perching, 20 November 2018; 9:36 am |
| Colombia | Risaralda, Pueblo Rico, Vereda Santa Cecilia | 5.2225 / -76.0294 | 1500 | MHN-UCa:1139 | This work |  |
| Colombia | Risaralda, Santa Rosa de Cabal, San Ramón - Los Alpes - Sendero casa de guardabosques- pluviómetro | 4.8129 / -75.5338 | 2591 | MHN-UCa:1934 | This work |  |
| Colombia | Risaralda, Santa Rosa de Cabal, San Ramón, Los Alpes | 4.813 / -75.5338 | 2603 | MHN-UCa:1935 | This work |  |
| Colombia | Risaralda, Marsella | 4.8867 / -75.7224 | 1829 |  | iNaturalist | Photograph |
| Colombia | Tolima, Murillo, Vereda Sabanalarga, sector Casas Viejas | 4.0995 / -75.1923 | 3100 | MHN-UCa: 830 | This work |  |
| Colombia | Tolima, Murillo, Vereda La Gloria | 4.8829 / -75.1574 | 3100 | MHN-UCa:949 | This work |  |
| Colombia | Tolima, Rioblanco, Finca La Yerbabuena, Vereda La Albania | 3.6222 / -75.8942 | 2675 | MHN-UCa 3181 | This work |  |
| Colombia | Tolima, Chaparral, PNN Las Hermosas | 3.727429 / -75.762215 | 2993 |  |  | https://www.parquesnacionales.gov.co/portal/wp-content/uploads/2013/12/parqueLasHermosas.pdf |
| Colombia | Tolima, Santa Isabel, Reserva Las Agüitas | 4.7139 / -75.0975 |  |  |  | Photograph |
| Colombia | Valle del Cauca, 4 km NW of San Antonio | 3.4929 / -76.6241 | 1764 | MVZ 124088 | Voss (2015), Ramírez-Chaves et al. (2016) |  |
| Colombia | Valle del Cauca, Palmira, Vereda Quisquina, Finca La Rivera | 3.5725 / -76.1807 | 1577 | MHN-UCa 3180 | This work |  |
| Colombia | Valle del Cauca, Bolívar | 4.3333 / -76.1833 | 978 | UV 3959, collector number: EVA 0237 | Alberico et al. (1999), Ramírez-Chaves et al. (2016) |  |
| Colombia | Valle del Cauca, Buga | 3.9 / -76.2833 | 1096 | UV 3241 | Alberico et al. (1999), Ramírez-Chaves et al. (2016) |  |
| Colombia | Valle del Cauca, Cali, Río Meléndez | 3.3877 / -76.5164 | 957 | UV 10940 | Alberico et al. (1999) |  |
| Colombia | Valle del Cauca, Reserva Natural Hato Viejo | 3.8232 / -76.4034 | 985 | RNHV unknown number | Alberico et al. (1999), Ramírez-Chaves et al. (2016) |  |
| Colombia | Valle del Cauca, Yumbo | 3.5768 / -76.5664 | 2004 |  | iNaturalist | Photograph |
| Colombia | Valle del Cauca, La Unión de Sucre | 4.5176 / -76.0937 | 965 |  | iNaturalist | Photograph |
| Colombia | Valle del Cauca, La Cumbre, Vereda Chicoral, Reserva Forestal de Bitaco | 3.60747 / -76.57507 | 1800 |  | Personal observation | Photograph |
| Ecuador | Azuay, Balcón del Azuay | -2.883 / -79.0797 | 2800 |  | Narváez-Romero et al. (2018) | Literature |
| Ecuador | Azuay, El Tuni | -2.752 / -79.011 | 3200 | MEPN 10433 | Narváez-Romero et al. (2018) |  |
| Ecuador | Azuay, Valle de Yunguilla | -3.1665/ -79.2666 | 2820 | QCAZ 7591 | Voss (2011, 2015), Narváez-Romero et al. (2018) |  |
| Ecuador | Carchi, Reserva Biológica Guandera | 0.6341 / -77.6879 | 3286 |  | Tirira and Boada (2009), Voss (2015), Narváez-Romero et al. (2018) | Literature |
| Ecuador | Carchi, Tulcán, Páramo "El Ángel", Reserva Ecológica "El Ángel" | 0.7759 / -77.9127 | 3754 |  | iNaturalist | Photograph |
| Ecuador | Chimborazo, Camino del Inca | -2.3894 / -78.8193 | 4387 |  | Narváez-Romero et al. (2018) | Literature |
| Ecuador | Imbabura, Pimampiro | -0.1768 / -78.194 | 2900 |  | Narváez-Romero et al. (2018), Romero et al. (2018) | Literature |
| Ecuador | Loja, 5 km from Saraguro | -3.6615 / -79.2688 | 2938 |  | Narváez-Romero et al. (2018) | Literature |
| Ecuador | Loja, Barrio Zamora Huayco | -4.0058 / -79.1845 | 2195 |  | Narváez-Romero et al. (2018) | Literature |
| Ecuador | Loja, Chaguarpamba | -3.872 / -79.6938 | 1120 |  | Narváez-Romero et al. (2018) | Literature |
| Ecuador | Loja, Loja | -4.0123 / -79.1882 | 2163 |  | iNaturalist | Photograph |
| Ecuador | Loja, Olmedo | -3.9354 / -79.6464 | 1284 |  | Narváez-Romero et al. (2018) | Literature |
| Ecuador | Loja, Quilanga | -4.2972 / -79.4011 | 1897 |  | Narváez-Romero et al. (2018) | Literature |
| Ecuador | Loja, Reserva de la Biosfera Podocarpus, El Cóndor | -4.0409 / -79.1757 | 2271 |  | iNaturalist | Photograph |
| Ecuador | Loja, Vicinity of Gonzanama | -4.2349 / -79.43 | 2092 |  | Narváez-Romero et al. (2018) | Literature |
| Ecuador | Loja, Vicinity of the Villonaco Wind Project | -4.0139 / -79.2439 | 2401 |  | Narváez-Romero et al. (2018) | Literature |
| Ecuador | Napo, Quijos, Volcán Chacana, Laguna Papallacta | -0.3772 / -78.1709 | 3410 |  | iNaturalist | Photograph |
| Ecuador | Napo, Quijos, Volcán Chacana | -0.3712 / -78.1143 | 2921 |  | iNaturalist | Photograph |
| Ecuador | Napo, Quijos, Volcán Chacana, Papallacta | -0.3867 / -78.1447 | 3260 |  | iNaturalist | Photograph |
| Ecuador | Napo, Río Napo | -0.7041 / -78.3114 | 3601 | BMNH 34.9.10.183 | Alberico et al. (1999), Voss (2015) |  |
| Ecuador | Tungurahua, Cordillera de Los Llaganantes, Tambo Jaramillo | -1.2399 / -78.3351 | 3914 | FMNH 47054 | Voss (2011, 2015) |  |
| Ecuador | Morona Santiago, Sangay National Park | -2.1917 / -78.4974 | 3650 |  | Brito and Ojala-Barbour (2016), Narváez-Romero et al. (2018) | Literature |
| Ecuador | Morona Santiago, Sangay National Park | -2.3889 / -78.3016 | 2500 |  | Brito and Ojala-Barbour (2016), Narváez-Romero et al. (2018) | Literature |
| Ecuador | Morona Santiago, Sucúa, Sangay National Park | -2.4231 / -78.3348 | 2994 |  | iNaturalist | Photograph |
| Ecuador | Tungurahua, Baños | - 1.3925 / -78.4271 | 1790 | MCZ 36327/UMMZ 83268 | Voss (2011, 2015), Narváez-Romero et al. (2018) |  |
| Ecuador | Zamora Chinchipe, Estación San Francisco | -3.9675 / -79.0741 | 1900 | MEPN 3260 | Narváez-Romero et al. (2018) |  |
| Peru | Área de conservación privada Chaparri | -6.6976 / -79.3579 | 396 | MUSM 23114/ING387 | More and Crespo (2016), Museum database |  |
| Peru | Piura | -5.1414 / -80.1048 | 2069 | MNH/MUSM 24339 | Museum database |  |
| Peru | Lambayeque, Chongoyape, Reserva Ecológica Chaparri | -6.6976 / -79.3579 | 396 |  | Williams (2008), Pacheco et al. (2009), Voss (2015) | Literature |
| Peru | Piura, Distrito Ayabaca, Socchabamba | -4.6158 / -79.6786 | 2485 |  | More and Crespo (2016), Narváez-Romero (2018) | Literature, Photograph |
| Peru | Piura, Distrito Ayabaca, Samanguilla | -4.625 / -79.5191 | 2335 |  | More and Crespo (2016), Narváez-Romero (2018) | Literature, Photograph |
| Peru | Piura, Distrito Ayabaca, Toronche | -4.7114 / -79.5877 | 2269-2308 | Literature | More and Crespo (2016), Narváez-Romero (2018) | Two dead individuals |
| Peru | Piura, Distrito Pacaipampa, Totora | -4.9852 / -79.5152 | 2570 | CORBIDI: MA-00370 | More and Crespo (2016), Narváez-Romero (2018) | Quills |
| Peru | Piura, Distrito Morropón, Ñoma | -5.0344 / -79.8311 | 1715 | Literature | More and Crespo (2016), Narváez-Romero (2018) | Photograph |
| Peru | Piura, Distrito de Huancabamba, Santa Rosa de Congona | -5.2538 / -79.4747 | 2490 | Literature | More and Crespo (2016), Narváez-Romero (2018) | “Pet” |
| Peru | Piura, Distrito de Huarmaca, San Juan de Palomataz | -5.73 / -79.5022 | 2700 | MUSM 24339 | More and Crespo (2016), Narváez-Romero (2018) | Roadkill |
| Peru | Lambayeque, Kañaris, Congoña | -6.0541 / -79.3355 | 2800 | Literature | More and Crespo (2016), Narváez-Romero (2018) | Photograph |

**References**

Acosta, L.H., Poma Urey, J.L., and Azurduy, H. (2018). Nuevos registros del puerco espín cola corta (*Coendou rufescens* Gray 1865) en bosques nublados de Bolivia. Kempffiana 14: 22–31.

Alberico, M., Rojas-Díaz, V., and Moreno, J.G. (1999). Aporte sobre la taxonomía y distribución de los puercoespines (Rodentia: Erethizontidae) en Colombia. Rev. Acad. Colomb. Cienc. Exact. Fis. Nat. 23 (Supl. especial) 23: 595–612.

Brito M.J., and Ojala-Barbour, R. (2016). Mamíferos no voladores del Parque Nacional Sangay, Ecuador. Pap. Avulsos Zool. 56: 45–61.

CAM, 2011. Plan de ordenación y manejo de la cuenca hidrográfica. POMCH de la quebrada Yaguilga.

CORPONARIÑO (2016). Informe de Gestión Institucional. Vigencia 2016. Corporación Autónoma Regional de Nariño.

Delgado-V., C. A. (2009). Non- volant mammals, Reserva San Sebastián- La Castellana, Valle de Aburrá, Antioquia, Colombia. Check List 5: 1– 4.

iNaturalist (2020).  iNaturalist Research-Grade Observations Dataset, Available at: <https://www.inaturalist.org.> (Accessed 17 October 2020).

More, A., and Crespo, S. (2016). Documented records of the stump-tailed porcupine *Coendou rufescens* (Erethizontidae, Rodentia) in northwestern Peru. The Biologist 14: 359–369.

Narváez-Romero, C., Reyes-Puig, C., Valle, D., and Brito, J. (2018). New records and estimation of the potential distribution of the Stump-Tailed Porcupine *Coendou rufescens*. Therya 9: 137–146.

Noguera-Urbano, E.A., Montenegro-Muñoz, S., Lasso, L. and Calderón, J. (2014). Mamíferos medianos y grandes en el piedemonte Andes-Amazonía de Monopamba-Puerres, Colombia. Brenesia 81-82: 111–114.

Pacheco, V., Cardenillas, R., Salas, E., Tello, C., and Zeballos, H. (2009). Diversidad y endemismo de los mamíferos del Perú. Rev.Per.Biol. 16: 5–32.

Peñuela-Diaz, G., Calonge-Camargo, B., and Aristizabal-G, H. (2016). *Aves y mamíferos presentes en el distrito regional de manejo integrado Cuchillas Negra y Guanaque*. Ecopetrol, Corporación Autónoma Regional de Chivor, E-qual servicios ambientales, Colombia.

Ramírez-Chaves, H.E., and Noguera-Urbano, E.A. (2010). Lista preliminar de los mamíferos (Mammalia: Theria) del departamento de Nariño, Colombia. Biota Colombiana 11(1 and 2): 115–138.

Ramírez-Chaves, H.E., Pérez, W., and Ramírez Mosquera, J. (2008). Mamíferos presentes en el municipio de Popayán, Cauca-Colombia. Boletín Científico, Centro de Museos, Museo de Historia Natural, Universidad de Caldas 12: 65–89.

Ramírez-Chaves, H.E., Suárez-Castro, A.F., Morales-Martínez, D.M., and Vallejo-Pareja, M.C. (2016). Richness and distribution of porcupines (Erethizontidae: *Coendou*) from Colombia. Mammalia 80: 181–191.

Restrepo-Cardona, J., Márquez, C., Echeverry-Galvis, M., Vargas, F.H., Sánchez-Bellaizá, D.M., and Renjifo, L.M. (2019). Deforestation May Trigger Black-and-Chestnut Eagle (*Spizaetus isidori*) predation on domestic fowl. Trop. Conserv. Sci. 12: 1–10.

Romero, V., Racines-Márquez, C.E., and Brito, J. (2018). A short review and worldwide list of wild albino rodents with the first report of albinism in *Coendou rufescens* (Rodentia: Erethizontidae). Mammalia 82: 509–515.

Sánchez, J.F., and Acosta, G.M. (2015). Pitalito Atlas Ambiental y de la Biodiversidad. Alcaldía Municipal de Pitalito, Colombia.

Sánchez, F., Sánchez-Palomino, P., and Cadena, A. (2004). Inventario de mamíferos en un bosque de los Andes centrales de Colombia. Caldasia26: 291–309.

Tirira, D., and Boada, C. (2009). Diversidad de mamíferos en bosques de Ceja Andina alta del nororiente de la provincia de Carchi, Ecuador. Bol. Téc. 8, Ser. Zool. 4: 1–24.

Voss, R.S. (2011). Revisionary notes on Neotropical porcupines (Rodentia: Erethizontidae). 3. An annotated checklist of the species of *Coendou* Lacepede, 1799. Am. Mus. Novit. 3720: 1–36.

Voss, R.S. (2015). Superfamily Erethizontoidea Bonaparte, 1845. In: Patton, J.L., Pardiñas, U.F.J., and D’Elía, G. (Eds.). *Mammals of South America Volume 2. Rodents.* The University of Chicago Press, Chicago, pp. 786–805.

Williams, R. (2008). Mamíferos de Chaparrí. In: Plenge, H., and Williams, R. (Eds). *Guía de la vida silvestre de Chaparrí*. Geográfica EIRL, Lima, pp. 103.

**Supplementary Table S2:** A summary of natural history and food items of *C. rufescens* in Colombia.

| **Activity** | **Locality** | **Date** | **Comments** | **Source** |
| --- | --- | --- | --- | --- |
| Food items | Colombia, Antioquia | 15 December 2019 | Leaves and fruits of *Sechium edule* | Photographs (this study) |
| Food items | Colombia, Cundinamarca | 15 December 2019 | Leaves and fruits of *Bejaria* (Ericaceae) | Photographs; (this study) |
| Food items | Colombia, Antioquia | 2019-2020 | Infructescences of *Cecropia angustifolia* | Ramírez-Chaves et al. (2020) |
| Pregnancy | Colombia, Caldas | November 2019 | One roadkilled individual. Total length of fetus: 290 mm. | MHN-UCa-M 3145 (this study) |
| Perching | Colombia, Antioquia | 15 December 2019 | *Pinus patula* | Photographs; (this study) |

**Supplementary Table S3:** A summary of threats of *Coendou rufescens* in Colombia.

| **Activity** | **Locality** | **Date** | **Comments** | **Source** |
| --- | --- | --- | --- | --- |
| Predation | Colombia: Risaralda (Distrito de Manejo Integrado, Planes de San Rafael, Risaralda, Lisbrán | 18 May 2019 (feces collected); October 2019 (dead specimen) | Predated by *Puma concolor* | Photographs, feces (this study) |
| Predation | Colombia: Caldas | 2016-2019 | Predated by *Puma concolor* | Feces (this work); Muñoz Castillo et al. (2020) |
| Attacks by domestic dogs | Colombia: Cauca, Risaralda, Valle del Cauca | 2019-2020 | Several events; dogs usually appear with quill in the head and legs | This study |
| Roadkill | Colombia: Caldas | 2017-2020  2019 (Manizales-Alto de Letras road) | Three adult females and one male | MHN-UCa-M 1586, 3145, 3195 (this study) |
| Roadkill | Colombia: Antioquia | 2012-2013 | Two individuals | Delgado Vélez 2014 |


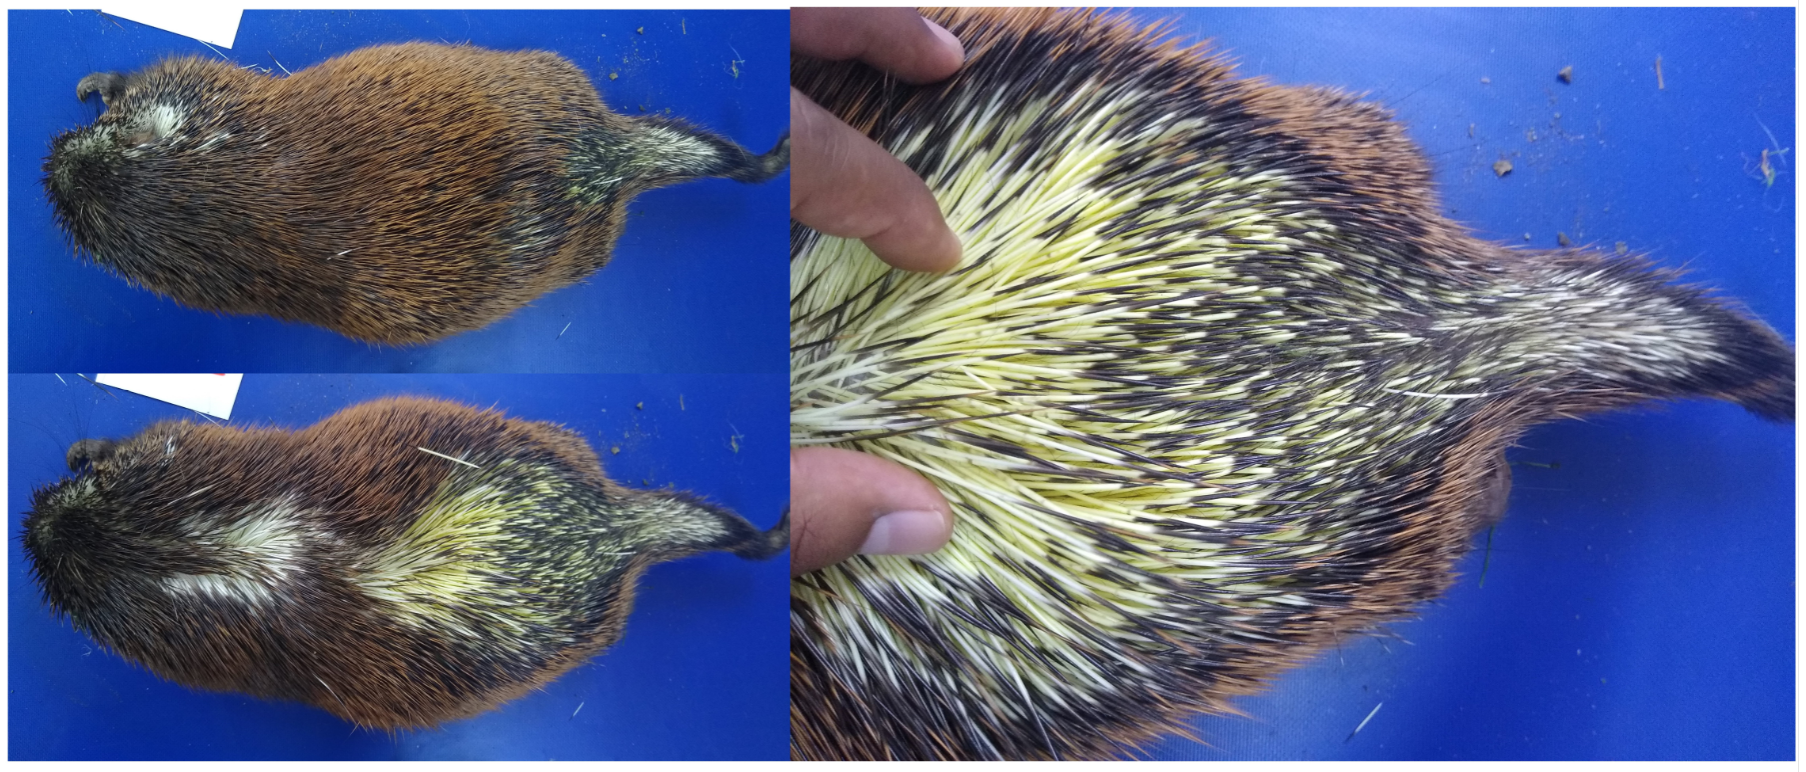


**Supplementary Figure S1:** Quills on the posterior part of the rump of the back bristle, showing the lighter base in the area around the tail (MHN-UCa uncatalogued found dead at Manizales, Caldas, Colombia).
